# Supplementary material for: Mortality among Workers Exposed to Polychlorinated Biphenyls (PCBs) in an Electrical Capacitor Manufacturing Plant in Indiana: An Update
Source: PubMed Central journal article supplement (PMC1332650; doi:10.1289/ehp.8253), 2005-09-01
Supplement: ehp0114-000018s1.pdf [file ehp0114-000018s1.pdf]

# Mortality Studies Among Capacitor and Transformer Manufacturing Workers Exposed to PCBs, Grouped by Study Site

| Site                                                | Reference                      | N                          | Study design | Eligibility criteria                       | Study dates | PCB Exposure (PCB type if stated)                                                                                                                                                                                                                                                              | Other exposure                                                           | Cohort deaths, ratio <sup>a</sup> (CI)                                                                                                         | Hi exp =                   | Hi exp deaths, ratio <sup>†</sup> (CI)                                                                                   |
|-----------------------------------------------------|--------------------------------|----------------------------|--------------|--------------------------------------------|-------------|------------------------------------------------------------------------------------------------------------------------------------------------------------------------------------------------------------------------------------------------------------------------------------------------|--------------------------------------------------------------------------|------------------------------------------------------------------------------------------------------------------------------------------------|----------------------------|--------------------------------------------------------------------------------------------------------------------------|
| Canada, Ontario, transformer manufacture and repair | (Liss 1989)                    | 1073: 273 women 800 men    | cohort       | ≥ 1 year work 1960-1976                    | -1985       | 1978 air samples 3-8 µg/m <sup>3</sup>                                                                                                                                                                                                                                                         | Benzene ca 45, SMR 1.2 (0.9-1.6)                                         | 146, SMR 1.0 (0.8-1.1);                                                                                                                        | Men ever in high exp job   | 24, SMR 0.8 (0.5-1.2); cancer 6, SMR 0.8 (0.3-1.9), lymph & hemat cancer 2 SMR 2.9 (0.3-12.4)                            |
| Canada, transformer manufacture                     | (Yassi et al. 1994)            | 2222: all men              | cohort       | ≥ 1 month work 1946-1975                   | -1989       | >27,000 gallons Askarels used in mfg                                                                                                                                                                                                                                                           | mineral oil, solvents                                                    | 63-171 <sup>b</sup> , SMR 0.7-1.1 (nss); cancer 18-36, SMR 0.8-1.2 (nss); GI ca 6-17, SMR 0.9-1.6 (nss); pancreas ca 5-11 SMR 2.9-7.6 (all ss) | Transformer assembly       | 35, SMR 0.9 (0.6-1.2); cancer 11, SMR 1.4 (0.7-2.5); GI cancer 5, SMR 2.3 (0.7-5.3); pancreas cancer 4, SMR 9.8 (2.6-25) |
| Italy, Milan vicinity, capacitor manufacture        | (Bertazzi et al. 1982)         | 1310: 1020 women, 290 men  | cohort       | ≥ 6 months work 1946-1978 production dept. | 1978        | 1954 air samples 5200-6800 µg/m <sup>3</sup> , 1977 TWA air samples 48-275 µg/m <sup>3</sup> , surface wipes 0.2-159 µg/cm <sup>2</sup> , dermal wipes 0.3-9.2 µg/cm <sup>2</sup> , blood levels (n=67) 230.5±174.5 ppb 54% chlorine PCBs; 114.1 ±79.6 ppb 42% chlorine PCBs; use stopped 1979 |                                                                          | 27, SMR 1.3 (0.9-1.9), ca 14, SMR 2.5 (1.4-4.2); lymph-hemat 4, SMR 4.4 (1.2-12.2)                                                             |                            |                                                                                                                          |
|                                                     | (Bertazzi et al. 1987)         | 2100: 1556 women, 544 men  | cohort       | ≥ 1 week work 1946-1978                    | 1982        | 1982 surface wipes 0.003-6.3 µg/cm <sup>2</sup> , dermal wipes 0.09-1.5 µg/cm <sup>2</sup> , blood levels (n=37) 202.8±111.7 ppb 54% chlorine PCBs; 42.9 ±34.7 ppb 42% chlorine PCBs                                                                                                           | TCE                                                                      | 64, SMR 1.2 (0.9-1.5), cancer 26, SMR 2.0 (1.3-2.9); lymph-hemat 7, SMR 3.0 (1.2-6.5); GI tract (men) 6, SMR 3.5 (1.3-8.1)                     |                            |                                                                                                                          |
|                                                     | (Tironi et al. 1996)           | 1556: all women            | cohort       | ≥ 1 week work 1946-1980, production dept.  | 1954-1982   | 1954 air samples 5200-6800 µg/m <sup>3</sup> , 1977 TWA air samples 48-275 µg/m <sup>3</sup> , surface wipes 0.2-159 µg/cm <sup>2</sup> , dermal wipes 0.3-9.2 µg/cm <sup>2</sup> , blood levels (n=67) 230.5±174.5 ppb 54% chlorine PCBs; 114.1 ±79.6 ppb 42% chlorine PCBs; use stopped 1980 |                                                                          | 47, SMR 1.4 (1.0-1.8), cancer 19, SMR 1.2 (0.7-1.8); lymph-hemat 5, SMR 1.4 (0.5-3.3)                                                          |                            |                                                                                                                          |
| Sweden, capacitor manufacture                       | (Gustavsson et al. 1986)       | 142: all men               | cohort       | ≥ 6 mo. work 1965-1978, Swedish            | 1982        | 42% chlorination                                                                                                                                                                                                                                                                               |                                                                          | 21, RR 1.0 (0.6-1.5); cancer 7, RR 1.3 (0.5-2.7)                                                                                               | Capacitor filler, repairer | “no tendency toward increased mortality”                                                                                 |
|                                                     | (Gustavsson and Hogstedt 1997) | 242: all men               | cohort       | ≥ 6 mo. work 1965-1978                     | 1965-1991   | Tasks IDd as low, med, hi PCB                                                                                                                                                                                                                                                                  |                                                                          | 56, SMR 1.2 (0.9-1.5); cancer 16, SMR 1.3 (0.8-2.2)                                                                                            | Impregnation & repair      | 23, SMR 1.6 (1.0-2.3); cancer 7, SMR 1.9 (0.8-3.9)                                                                       |
| USA, Illinois, capacitor manufacture                | (Mallin et al. 2004)           | 2885: 1707 women, 1178 men | cohort       | At least 1 day in ≥ 1 quarter 1944-1977    | 1944-2000   | Arochlor 1254 1952-1956 Arochlor 1242 1954-1970 Arochlor 1016 1970-1979                                                                                                                                                                                                                        | Chlorinated naphthalenes 1944-1981, di-2-ethylhexyl phthalate, 1979-1981 | 1546, SMR 1.01 (1.0-1.1); ca 347, SMR 1.10 (1.0-1.2); liver, biliary 14, SMR 2.38 (1.3-4.1); stomach 17, SMR 1.89 (1.1-3.1)                    | >5 yrs between 1952-1977   | Male stomach 3, SMR 3.09 (0.6-9.0); female intestine 9, 2.25 (1.0-4.3); female liver 4, SMR 5.57 (1.5-14.3)              |

| Site                                                    | Reference               | N                               | Study design      | Eligibility criteria                                                         | Study dates | PCB Exposure (PCB type if stated)                                                                                                                                                                                                                                                                          | Other exposure                                                                            | Cohort deaths, ratio <sup>a</sup> (CI)                                                                                                     | Hi exp =      | Hi exp deaths, ratio <sup>†</sup> (CI)                                      |
|---------------------------------------------------------|-------------------------|---------------------------------|-------------------|------------------------------------------------------------------------------|-------------|------------------------------------------------------------------------------------------------------------------------------------------------------------------------------------------------------------------------------------------------------------------------------------------------------------|-------------------------------------------------------------------------------------------|--------------------------------------------------------------------------------------------------------------------------------------------|---------------|-----------------------------------------------------------------------------|
| USA, Indiana, capacitor manufacture                     | (Sinks et al. 1992)     | 3588: 846 women, 2742 men       | cohort            | ≥ 1 day work 1957-1977, known or presumed Caucasian, work history complete   | 1957-1986   | 1977 air samples: zone 5 personal 94±68 µg/m <sup>3</sup> , area 76±52 µg/m <sup>3</sup> ; zone 3 area 59±19 µg/m <sup>3</sup> ; zone 2 area 48±13 µg/m <sup>3</sup> ; zone 1 area 16±15 µg/m <sup>3</sup> ; 1977 serum: only zone 5, 763±1117 ng/ml; only zone 3, 100±27 ng/ml; only zone 2, 121±61 ng/ml | 1,1,1-trichloroethane, TCE, MEK, toluene, xylene                                          | 192, SMR 0.7 (0.6-0.8); cancer 54, SMR 0.8 (0.6-1.1); skin 8, SMR 4.1 (1.8-8.0); brain 5, SMR 1.8 (0.6-4.2)                                | ≥10 yrs work  | Skin cancer 3, SMR 7.0 (1.4-23); brain cancer 3, SMR 4.8 (1.0-16)           |
| USA, Massachusetts, New Bedford, capacitor manufacture  | (Brown & Jones 1981)    | 1599: 924 women 675 men         | cohort            | ≥ 3 mo. work 1946-1976, possible PCB exposure, no TCE exposure               | -1976       | 1977 TWA personal air samples 170-1260 µg/m <sup>3</sup> , area samples 50-810 µg/m <sup>3</sup>                                                                                                                                                                                                           | TCE exposure (at degreasers, 53-78 ppm)                                                   | 90, SMR 0.9 (0.7-1.1); cancer 26, SMR 1.0 (0.6-1.4); rectal 3, SMR 4.3 (0.9-14); liver 2, SMR 3.0 (0.3-13); cirrhosis 5, SMR 1.6 (0.5-3.9) | entire cohort |                                                                             |
|                                                         | (Brown 1987)            | 1607: 930 women, 677 men        | cohort            | ≥ 3 mo. work 1946-1977, possible PCB exposure, no TCE exposure               | -1982       | 1977 TWA personal air samples 170-1260 µg/m <sup>3</sup> , area samples 50-810 µg/m <sup>3</sup>                                                                                                                                                                                                           | Degreaser TCE exposure, 53-78 ppm                                                         | 179, SMR 1.0 (0.8-1.1); cancer 44, SMR 0.9 (0.7-1.2); rectal 3, SMR 2.7 (0.6-1.2); liver 4, SMR 3.3 (0.9-9.3)                              | entire cohort | Excess liver ca in women: 4, SMR 4.4 (1.2-12.3)                             |
| USA, New York, capacitor manufacture                    | (Brown & Jones 1981)    | 968: 385 women, 583 men         | cohort            | ≥ 3 mo. work 1938-1976, possible PCB exposure, no TCE exposure               | -1976       | 1977 TWA personal air samples 24-393 µg/m <sup>3</sup> , area samples 3-476 µg/m <sup>3</sup>                                                                                                                                                                                                              | Degreaser TCE exposure, <35 - 321 ppm                                                     | 73, SMR 1.0 (0.8-1.2); cancer 13, SMR 0.8 (0.4-1.3); rectal 1, SMR 2.1 (0.0-17); liver 1, SMR 2.4 (0.0-20); cirrhosis 1, SMR 0.4 (0.0-3.4) | entire cohort |                                                                             |
|                                                         | (Brown 1987)            | 981: 383 women, 593 men         | cohort            | ≥ 3 mo. work 1938-1977, possible PCB exposure, no TCE exposure               | -1982       | 1977 TWA personal air samples 24-393 µg/m <sup>3</sup> , area samples 3-476 µg/m <sup>3</sup>                                                                                                                                                                                                              | Degreaser TCE exposure, <35 - 321 ppm                                                     | 116, SMR 0.9 (0.7-1.1); cancer 18, SMR 0.6 (0.3-0.9); rectal 1, SMR 1.2 (0.0-10); liver 1, SMR 0.7 (0.0-5.4)                               | entire cohort |                                                                             |
| USA, Massachusetts, Pittsfield, transformer manufacture | (Greenland et al. 1994) | ~3500 death ever employed study | death certificate | Worked 1930s-1984, vested in pension fund, white male, job history available | 1969-1984   | Pyranol transformer oil                                                                                                                                                                                                                                                                                    | Trichlorobenzene, benzene, TCE, other solvents, machining fluids, asbestos, resin systems | 1821 all cause, 513 cancer, 33 pancreas cancer, 37 lymph-hematopoietic                                                                     | Any vs. none  | Liver-biliary OR 2.4 (0.6-9.7), lymphomas OR 3.3 (1.1-9.3) for PCB exposure |

| Site                                          | Reference                     | N                                      | Study design | Eligibility criteria                                                       | Study dates | PCB Exposure (PCB type if stated)                                                                                                                                                                                                                                                                                                                   | Other exposure                              | Cohort deaths, ratio <sup>a</sup> (CI)                                                                                                                                                              | Hi exp =          | Hi exp deaths, ratio <sup>†</sup> (CI)                                                                                   |
|-----------------------------------------------|-------------------------------|----------------------------------------|--------------|----------------------------------------------------------------------------|-------------|-----------------------------------------------------------------------------------------------------------------------------------------------------------------------------------------------------------------------------------------------------------------------------------------------------------------------------------------------------|---------------------------------------------|-----------------------------------------------------------------------------------------------------------------------------------------------------------------------------------------------------|-------------------|--------------------------------------------------------------------------------------------------------------------------|
| USA,<br>New York,<br>capacitor<br>manufacture | (Brown & Jones 1981) 968:     | 385<br>women,<br>583<br>men            | cohort       | ≥ 3 mo. work<br>1938-1976,<br>possible PCB<br>exposure, no TCE<br>exposure | -1976       | 1977 TWA personal air samples 24-<br>393 µg/m <sup>3</sup> , area samples 3-476 µg/m <sup>3</sup>                                                                                                                                                                                                                                                   | Degreaser TCE<br>exposure, <35 -<br>321 ppm | 73, SMR 1.0 (0.8-1.2); cancer<br>13, SMR 0.8 (0.4-1.3); rectal 1,<br>SMR 2.1 (0.0-17); liver 1, SMR<br>2.4 (0.0-20); cirrhosis 1, SMR<br>0.4 (0.0-3.4)                                              | entire cohort     |                                                                                                                          |
|                                               | (Brown 1987)                  | 981:<br>383<br>women,<br>593<br>men    | cohort       | ≥ 3 mo. work<br>1938-1977,<br>possible PCB<br>exposure, no TCE<br>exposure | -1982       | 1977 TWA personal air samples 24-<br>393 µg/m <sup>3</sup> , area samples 3-476 µg/m <sup>3</sup>                                                                                                                                                                                                                                                   | Degreaser TCE<br>exposure, <35 -<br>321 ppm | 116, SMR 0.9 (0.7-1.1);<br>cancer 18, SMR 0.6 (0.3-0.9);<br>rectal 1, SMR 1.2 (0.0-10);<br>liver 1, SMR 0.7 (0.0-5.4)                                                                               | entire cohort     |                                                                                                                          |
|                                               | (Taylor et al. 1988)          | 6292:<br>2691<br>women,<br>3601<br>men | cohort       | ≥ 3 months work<br>1946-1975                                               | -1980       | 1975 air samples geometric mean (GM)<br>679 µg/m <sup>3</sup> direct exposure areas; GM<br>260 µg/m <sup>3</sup> indirect exposure areas;<br>1977 air samples GM 310 µg/m <sup>3</sup><br>direct exposure areas; GM 27 µg/m <sup>3</sup><br>indirect exposure areas; 1977 personal<br>air samples GM 168 µg/m <sup>3</sup> direct<br>exposure areas |                                             | 510, SMR 0.83 (0.76, 0.91);<br>cancer 136, SMR 0.9 (0.8-1.1);<br>GI cancer 44, SMR 1.3 (1.0-1.8);<br>skin 3, SMR 1.0 (0.2-3.2); brain 1,<br>SMR 0.2 (0.0-1.6); lymph-hemat<br>10, SMR 0.7 (0.3-1.3) |                   |                                                                                                                          |
|                                               | (Kimbrough et al. 1999) 7075: | 3013<br>women,<br>4062<br>men          | cohort       | ≥ 3 months work<br>1946-1977                                               | 1946-1993   | Hi exp: Filling & impregnating 1975<br>air samples 227-1500 µg/m <sup>3</sup>                                                                                                                                                                                                                                                                       |                                             | 1195, SMR 0.8 (0.7-0.8);<br>cancer 353, SMR 0.9 (0.8-1.0);<br>rectal 10, SMR 1.3 (0.6-2.5);<br>liver 5, SMR 0.9 (0.3-2.0)                                                                           | Hourly<br>workers | 966, SMR 0.9(0.8-0.9);<br>ca 278, SMR 1.0 (0.8-1.1);<br>rectal 7, SMR 1.2 (0.5-<br>2.6); liver 4, SMR 0.9<br>(0.2-2.4)   |
|                                               | (Kimbrough et al. 2003) 7075: | 3013<br>women,<br>4062<br>men          | cohort       | ≥ 3 months work<br>1946-1977                                               | 1946-1998   | Hi exp: Filling & impregnating 1975<br>air samples 227-1500 µg/m <sup>3</sup>                                                                                                                                                                                                                                                                       |                                             | 1654, SMR 0.9 (0.85-0.93);<br>cancer 492 SMR 1.0 (0.9-1.1);<br>rectal 12, SMR 1.3 (0.7-2.3);<br>liver 9, SMR 0.8 (0.4-1.5)                                                                          | Hourly<br>workers | 1333, SMR 1.0 (0.9-1.0);<br>ca 381, SMR 1.0 (0.9-1.2);<br>rectal 8, SMR 1.2 (0.5-<br>2.4); liver 8, SMR 1.0<br>(0.4-1.9) |

a. Odds ratio (OR), standardized mortality ratio (SMR), or relative risk (RR).

b. Yassi used various eligibility criteria and calculated SMRs for each set.

## References

- Bertazzi PA, Riboldi L, Pesatori A, Radice L, Zocchetti C. 1987. Cancer mortality of capacitor manufacturing workers. *Am J Ind Med* 11: 165-76.
- Bertazzi PA, Zocchetti C, Guercilena S, Della Foglia M, Pesatori AC, Riboldi L (1982) Mortality study of male and female workers exposed to PCBs. In: *Prevention of Occupational Cancer--International Symposium* pp. 242-248. International Labour Office, Geneva.
- Brown DP. 1987. Mortality of workers exposed to polychlorinated biphenyls--an update. *Arch Environ Health* 42: 333-9.
- Brown DP, Jones M. 1981. Mortality and industrial hygiene study of workers exposed to polychlorinated biphenyls. *Arch Environ Health* 36: 120-9.
- Greenland S, Salvan A, Wegman DH, Hallock MF, Smith TJ. 1994. A case-control study of cancer mortality at a transformer-assembly facility. *Int Arch Occup Environ Health* 66: 49-54.
- Gustavsson P, Hogstedt C. 1997. A cohort study of Swedish capacitor manufacturing workers exposed to polychlorinated biphenyls (PCBs). *Am J Ind Med* 32: 234-9.
- Gustavsson P, Hogstedt C, Rappe C. 1986. Short-term mortality and cancer incidence in capacitor manufacturing workers exposed to polychlorinated biphenyls (PCBs). *Am J Ind Med* 10: 341-4.
- Kimbrough RD, Doemland ML, LeVois ME. 1999. Mortality in male and female capacitor workers exposed to polychlorinated biphenyls. *J Occup Environ Med* 41: 161-71.
- Kimbrough RD, Doemland ML, Mandel JS. 2003. A mortality update of male and female capacitor workers exposed to polychlorinated biphenyls. *J Occup Environ Med* 45: 271-82.
- Liss GM. 1989. *Mortality and Cancer Morbidity Among Transformer Manufacturing Workers*. Toronto, Canada: Ontario Ministry of Labour Policy and Regulations Branch Health Studies Service.
- Mallin K, McCann K, D'Aloisio A, Freels S, Piorkowski J, Dimos J et al. 2004. Cohort mortality study of capacitor manufacturing workers, 1944-2000. *J Occup Environ Med* 46: 565-76.
- Sinks T, Steele G, Smith AB, Watkins K, Shults RA. 1992. Mortality among workers exposed to polychlorinated biphenyls. *Am J Epidemiol* 136: 389-98.
- Taylor PR, Stelma JM, Auger I, Lawrence CE. 1988. *The relation of occupational polychlorinated biphenyl exposure to cancer and total mortality*. Cambridge, Massachusetts: Harvard School of Public Health.
- Tironi A, Pesatori A, Consonni D, Zocchetti C, Bertazzi PA. 1996. Mortality di lavoratrici esposte a PCB [The mortality of female workers exposed to PCBs]. *Epidemiol Prev* 20: 200-2.
- Yassi A, Tate R, Fish D. 1994. Cancer mortality in workers employed at a transformer manufacturing plant. *Am J Ind Med* 25: 425-37.
